# Supplementary material
Source: MDPI journal article supplement (https://www.mdpi.com/2071-1050/15/14/11041)
Supplement: s1 [file s1]

**Table S1. WQI of different water sources for the pre and post-monsoon seasons.**

| Non-Mining<br>Area | Pre-Monsoon Season |                | Post-Monsoon Season |                | Source Type |
|--------------------|--------------------|----------------|---------------------|----------------|-------------|
|                    | WQI                | Classification | WQI                 | Classification |             |
| R-1                | 29.40              | Good           | 33.21               | Good           | DW          |
| R-2                | 32.00              | Good           | 70.77               | Poor           | RW          |
| R-3                | 39.22              | Good           | 55.85               | Poor           | DW/TW       |
| R-4                | 33.17              | Good           | 74.78               | Poor           | RW          |
| R-5                | 16.31              | Excellent      | 44.08               | Good           | RW          |
| R-6                | 21.27              | Excellent      | 72.00               | Poor           | TW/HP       |
| R-7                | 24.02              | Excellent      | 48.20               | Good           | TW          |
| R-8                | 31.32              | Good           | 39.19               | Good           | DW/TW       |
| R-9                | 17.27              | Excellent      | 33.17               | Good           | TW          |
| R-10               | 31.80              | Good           | 71.98               | Poor           | DW          |
| R-11               | 31.46              | Good           | 39.14               | Good           | RW          |
| R-12               | 32.76              | Good           | 32.34               | Good           | RW          |
| R-13               | 29.85              | Good           | 32.99               | Good           | HP/TW       |
| R-16               | 13.18              | Excellent      | 47.90               | Good           | HP          |
| R-17               | 18.25              | Excellent      | 41.40               | Good           | HP          |
| R-18               | 29.27              | Good           | 32.92               | Good           | RW          |
| R-19               | 18.61              | Excellent      | 46.89               | Good           | HP          |
| R-20               | 17.74              | Excellent      | 54.43               | Poor           | TW          |
| R-21               | 30.16              | Good           | 35.50               | Good           | HP          |
| R-22               | 27.27              | Good           | 65.35               | Poor           | HP          |
| R-25               | 15.99              | Excellent      | 42.18               | Good           | TW          |
| R-26               | 17.76              | Excellent      | 26.13               | Good           | DW          |
| R-27               | 31.43              | Good           | 47.49               | Good           | DW          |
| R-28               | 18.30              | Excellent      | 47.48               | Good           | DW          |
| R-29               | 33.47              | Good           | 45.20               | Good           | RW          |
| R-30               | 37.22              | Good           | 73.25               | Poor           | RW          |
| R-31               | 31.23              | Good           | 31.03               | Good           | DW          |
| R-32               | 44.25              | Good           | 45.98               | Good           | RW          |
| R-33               | 19.52              | Excellent      | 35.00               | Good           | TW          |
| R-38               | 30.64              | Good           | 39.30               | Good           | DW/HP       |
| R-44               | 64.80              | Poor           | 42.47               | Good           | RW          |
| R-45               | 37.88              | Good           | 68.49               | Poor           | RW          |
| R-49               | 18.11              | Excellent      | -                   | -              | RW          |
| R-50               | 20.77              | Excellent      | -                   | -              | DW          |
| <b>Mining Area</b> |                    |                |                     |                |             |
| R-14               | 38.55              | Good           | 81.37               | Very Poor      | MW          |
| R-15               | 38.06              | Good           | 65.99               | Poor           | MW          |
| R-23               | 37.08              | Good           | 37.87               | Good           | MW          |
| R-24               | 32.58              | Good           | 67.55               | Poor           | MW          |
| R-34               | 54.84              | Poor           | 73.43               | Poor           | MW          |
| R-35               | 51.64              | Poor           | 65.76               | Poor           | MW          |
| R-36               | 45.53              | Good           | 50.42               | Poor           | DW          |
| R-37               | 22.71              | Good           | 43.74               | Good           | DW          |
| R-39               | 35.11              | Good           | 38.49               | Good           | DW          |
| R-40               | 52.67              | Poor           | 61.34               | Poor           | MW          |
| R-41               | 49.41              | Good           | 66.92               | Poor           | MW          |
| R-42               | 248.67             | Unfit          | 156.65              | Unfit          | MW          |
| R-43               | 251.69             | Unfit          | 118.15              | Unfit          | MW          |
| R-46               | 57.47              | Poor           | 87.11               | Very Poor      | DW          |
| R-47               | 88.16              | Very Poor      | 67.79               | Poor           | MW          |
| R-48               | 47.43              | Good           | 49.13               | Good           | MW          |

**Note: RW-River Water, MW- Mine Water, GW- Groundwater, DW- Dug Well, HP- Hand Pump and TW- Tube Well**

**Table S2. Collin's ratio of different water sources in pre and post-monsoon seasons.**

| Non-Mining Samples    | Pre-Monsoon   |                | Post-Monsoon  |                | Source type |
|-----------------------|---------------|----------------|---------------|----------------|-------------|
|                       | Collins ratio | Classification | Collins ratio | Classification |             |
| R-1                   | 1.699         | Not suitable   | 1.431         | Not suitable   | DW          |
| R-2                   | 1.746         | Not suitable   | 1.080         | Not suitable   | RW          |
| R-3                   | 1.172         | Not suitable   | 1.094         | Not suitable   | DW/TW       |
| R-4                   | 1.383         | Not suitable   | 0.979         | Suitable       | RW          |
| R-5                   | 0.975         | Suitable       | 0.978         | Suitable       | RW          |
| R-6                   | 0.656         | Suitable       | 1.043         | Not suitable   | TW/HP       |
| R-7                   | 0.460         | Suitable       | 0.887         | Suitable       | TW          |
| R-8                   | 0.948         | Suitable       | 1.232         | Not suitable   | DW/TW       |
| R-9                   | 0.532         | Suitable       | 1.024         | Not suitable   | TW          |
| R-10                  | 2.439         | Not suitable   | 2.120         | Not suitable   | DW          |
| R-11                  | 1.449         | Not suitable   | 1.125         | Not suitable   | RW          |
| R-12                  | 1.247         | Not suitable   | 1.257         | Not suitable   | RW          |
| R-13                  | 0.967         | Suitable       | 0.867         | Suitable       | HP/TW       |
| R-16                  | 0.462         | Suitable       | 1.170         | Not suitable   | HP          |
| R-17                  | 0.653         | Suitable       | 0.771         | Suitable       | HP          |
| R-18                  | 1.443         | Not suitable   | 0.840         | Suitable       | RW          |
| R-19                  | 0.638         | Suitable       | 1.359         | Not suitable   | HP          |
| R-20                  | 0.663         | Suitable       | 0.825         | Suitable       | TW          |
| R-21                  | 0.613         | Suitable       | 0.758         | Suitable       | HP          |
| R-22                  | 0.692         | Suitable       | 0.860         | Suitable       | HP          |
| R-25                  | 0.543         | Suitable       | 0.645         | Suitable       | TW          |
| R-26                  | 0.803         | Suitable       | 2.049         | Not suitable   | DW          |
| R-27                  | 1.772         | Not suitable   | 1.114         | Not suitable   | DW          |
| R-28                  | 0.676         | Suitable       | 1.658         | Not suitable   | DW          |
| R-29                  | 1.453         | Not suitable   | 1.329         | Not suitable   | RW          |
| R-30                  | 1.636         | Not suitable   | 1.609         | Not suitable   | RW          |
| R-31                  | 2.441         | Not suitable   | 1.327         | Not suitable   | DW          |
| R-32                  | 1.898         | Not suitable   | 1.127         | Not suitable   | RW          |
| R-33                  | 0.683         | Suitable       | 0.924         | Suitable       | TW          |
| R-38                  | 0.632         | Suitable       | 1.647         | Not suitable   | DW/HP       |
| R-44                  | 0.035         | Suitable       | 0.125         | Suitable       | RW          |
| R-45                  | 1.270         | Not suitable   | 1.146         | Not suitable   | RW          |
| R-49                  | 0.685         | Suitable       | -             | -              | RW          |
| R-50                  | 1.160         | Suitable       | -             | -              | DW          |
| <b>Mining Samples</b> |               |                |               |                |             |
| R-14                  | 2.763         | Not suitable   | 2.336         | Not suitable   | MW          |
| R-15                  | 2.670         | Not suitable   | 2.268         | Not suitable   | MW          |
| R-23                  | 2.424         | Not suitable   | 1.845         | Not suitable   | MW          |
| R-24                  | 2.583         | Not suitable   | 2.143         | Not suitable   | MW          |
| R-34                  | 2.232         | Not suitable   | 1.990         | Not suitable   | MW          |
| R-35                  | 2.153         | Not suitable   | 1.837         | Not suitable   | MW          |
| R-36                  | 2.359         | Not suitable   | 1.941         | Not suitable   | DW          |
| R-37                  | 0.763         | Suitable       | 0.922         | Suitable       | DW          |
| R-39                  | 0.170         | Suitable       | 1.070         | Not suitable   | DW          |
| R-40                  | 0.009         | Suitable       | 0.395         | Suitable       | MW          |
| R-41                  | 0.006         | Suitable       | 0.038         | Suitable       | MW          |
| R-42                  | 0.001         | Suitable       | 0.091         | Suitable       | MW          |
| R-43                  | 0.007         | Suitable       | 0.103         | Suitable       | MW          |
| R-46                  | 4.490         | Injurious      | 1.534         | Not suitable   | DW          |
| R-47                  | 0.010         | Suitable       | 0.069         | Suitable       | MW          |
| R-48                  | 0.011         | Suitable       | 0.109         | Suitable       | MW          |

**Note:** RW-River Water, MW- Mine Water, GW- Groundwater, DW- Dug Well, HP- Hand Pump and TW- Tube Well

**Table S3.  $\delta D$ ,  $\delta^{18}O$  and d-excess values for the water samples of the study area.**

| S.No | Location                   | Sample Code | Source Type | Lat. (N) | Long. (E) | $\delta^{18}O$ | $\delta D$ | d-excess |
|------|----------------------------|-------------|-------------|----------|-----------|----------------|------------|----------|
| 1    | Gonda                      | R-1         | DW          | 23.4263  | 83.0587   | -4.21          | -32.27     | 1.42     |
| 2    | Mahan River S 7            | R-2         | RW          | 23.4508  | 83.0763   | 0.06           | -10.21     | -10.70   |
| 3    | Parvatipur                 | R-3         | DW/TW       | 23.4392  | 83.1096   | -6.69          | -46.11     | 7.43     |
| 4    | Mahan River S 6            | R-4         | RW          | 23.4372  | 83.0791   | -0.43          | -12.80     | -9.37    |
| 5    | Banki River                | R-5         | RW          | 23.4176  | 83.0997   | -0.90          | -18.39     | -11.22   |
| 6    | Palda                      | R-6         | TW/HP       | 23.4088  | 83.0984   | -6.37          | -43.89     | 7.08     |
| 7    | Chhatarpur Para/Patouapara | R-7         | TW          | 23.4111  | 83.0760   | -6.56          | -46.14     | 6.37     |
| 8    | Bagrd                      | R-8         | DW/TW       | 23.3710  | 83.1073   | -6.73          | -46.11     | 7.74     |
| 9    | Dharampur                  | R-9         | TW          | 23.4055  | 83.1777   | -7.02          | -46.82     | 9.37     |
| 10   | Maridand                   | R-10        | DW          | 23.3468  | 83.1598   | -2.38          | -26.40     | -7.35    |
| 11   | Mahan River S 2            | R-11        | RW          | 23.3340  | 83.1504   | -0.79          | -19.30     | -12.99   |
| 12   | Gohangar Nala              | R-12        | RW          | 23.3436  | 83.1709   | -0.92          | -16.18     | -8.86    |
| 13   | Kotripara                  | R-13        | HP/TW       | 23.3501  | 83.2291   | -5.90          | -42.15     | 5.07     |
| 14   | Mahan II Inlet             | R-14        | MW          | 23.3611  | 83.2246   | -2.68          | -24.82     | -3.37    |
| 15   | Mahan II Outlet            | R-15        | MW          | 23.3635  | 83.2270   | -2.80          | -34.47     | -12.03   |
| 16   | Choura                     | R-16        | HP          | 23.3720  | 83.2279   | -6.55          | -46.07     | 6.33     |
| 17   | Silphili                   | R-17        | HP          | 23.4190  | 83.2548   | -6.75          | -46.53     | 7.44     |
| 18   | Mahan River S 1            | R-18        | RW          | 23.3253  | 83.1915   | -1.14          | -19.00     | -9.92    |
| 19   | Khargawan                  | R-19        | HP          | 23.3068  | 83.1924   | -6.68          | -46.67     | 6.77     |
| 20   | Kalyanpur                  | R-20        | TW          | 23.2432  | 83.1913   | -6.97          | -48.96     | 6.77     |
| 21   | Karwan                     | R-21        | HP          | 23.2416  | 83.0522   | -6.50          | -45.02     | 6.95     |
| 22   | Hiradabri/Maheshpur        | R-22        | HP          | 23.2166  | 83.0704   | -6.23          | -45.36     | 4.46     |
| 23   | Nawapara Inlet             | R-23        | MW          | 23.2213  | 83.0897   | -5.67          | -41.25     | 4.09     |
| 24   | Nawapara Outlet            | R-24        | MW          | 23.2213  | 83.0897   | -5.87          | -41.24     | 5.73     |
| 25   | Latori                     | R-25        | TW          | 23.2307  | 83.0952   | -6.75          | -49.70     | 4.27     |

|    |                 |      |       |         |         |       |        |        |
|----|-----------------|------|-------|---------|---------|-------|--------|--------|
| 26 | Tulsi           | R-26 | DW    | 23.2676 | 83.0997 | -6.74 | -46.84 | 7.11   |
| 27 | Chikni          | R-27 | DW    | 23.3075 | 83.0507 | -5.59 | -40.14 | 4.58   |
| 28 | Bojha           | R-28 | DW    | 23.3197 | 83.1236 | -6.53 | -45.13 | 7.07   |
| 29 | Mahan River S 3 | R-29 | RW    | 23.3399 | 83.1399 | -0.61 | -17.97 | -13.05 |
| 30 | Banki Nala      | R-30 | RW    | 23.3311 | 83.1385 | -1.24 | -20.95 | -11.01 |
| 31 | Mayapuri        | R-31 | DW    | 23.3456 | 83.1120 | -6.68 | -49.34 | 4.11   |
| 32 | Galphuli nala   | R-32 | RW    | 23.3126 | 83.1131 | 5.13  | 21.85  | -19.20 |
| 33 | Jhigador        | R-33 | TW    | 23.3210 | 83.0872 | -6.74 | -48.31 | 5.59   |
| 34 | Shivani Inlet   | R-34 | MW    | 23.3498 | 83.0745 | -5.61 | -40.02 | 4.84   |
| 35 | Shivani Outlet  | R-35 | MW    | 23.3489 | 83.0744 | -5.10 | -35.95 | 4.84   |
| 36 | Kodasa          | R-36 | DW    | 23.3563 | 83.0635 | -5.20 | -37.45 | 4.14   |
| 37 | Jarhi           | R-37 | DW    | 23.3569 | 83.0381 | -6.31 | -45.74 | 4.78   |
| 38 | Dugga           | R-38 | DW/HP | 23.3518 | 83.0122 | -6.10 | -42.79 | 6.01   |
| 39 | Bhatgaon        | R-39 | DW    | 23.3505 | 83.0011 | -5.24 | -39.94 | 2.00   |
| 40 | Bhatgaon Inlet  | R-40 | MW    | 23.3573 | 83.0065 | -5.57 | -41.90 | 2.68   |
| 41 | Bhatgaon Outlet | R-41 | MW    | 23.3573 | 83.0065 | -3.60 | -32.54 | -3.73  |
| 42 | Mahan 1 Inlet   | R-42 | MW    | 23.3840 | 83.0141 | -3.27 | -29.93 | -3.75  |
| 43 | Mahan 1 Outlet  | R-43 | MW    | 23.3840 | 83.0141 | -1.21 | -23.60 | -13.93 |
| 44 | Mashan Nala     | R-44 | RW    | 23.3833 | 83.0500 | -2.97 | -24.89 | -1.11  |
| 45 | Mahan River S 5 | R-45 | RW    | 23.4175 | 83.0656 | -0.56 | -15.47 | -11.00 |
| 46 | Pondi           | R-46 | DW    | 23.3905 | 83.0203 | -3.99 | -39.31 | -7.36  |
| 47 | Mahamaya Inlet  | R-47 | MW    | 23.3668 | 83.0044 | -5.63 | -48.29 | -3.27  |
| 48 | Mahamaya Outlet | R-48 | MW    | 23.3668 | 83.0044 | -5.63 | -47.13 | -2.13  |
| 49 | -               | R-49 | RW    | 22.8282 | 83.3633 | -4.98 | -47.15 | -7.35  |
| 50 | -               | R-50 | GW    | 22.8780 | 83.2812 | -6.18 | -51.79 | -2.32  |

Note: RW-River Water, MW- Mine Water, GW- Groundwater, DW- Dug Well, HP- Hand Pump and TW- Tube Well

**Table S4. Physico-chemical parameters of various water sources during Pre-monsoon season.**

| ID   | pH   | EC  | TDS | F <sup>-</sup> | Cl <sup>-</sup> | HCO <sub>3</sub> <sup>-</sup> | SO <sub>4</sub> <sup>2-</sup> | NO <sub>3</sub> <sup>-</sup> | Ca <sup>2+</sup> | Mg <sup>2+</sup> | Na <sup>+</sup> | K <sup>+</sup> |
|------|------|-----|-----|----------------|-----------------|-------------------------------|-------------------------------|------------------------------|------------------|------------------|-----------------|----------------|
| R-1  | 6.84 | 205 | 158 | 0.21           | 8.9             | 99                            | 3.08                          | 7.13                         | 13.46            | 15.87            | 7.1             | 2.91           |
| R-2  | 7.75 | 220 | 185 | 0.23           | 7.4             | 102.7                         | 29.21                         | 0.12                         | 20.19            | 12.06            | 9.5             | 3.29           |
| R-3  | 6.44 | 139 | 134 | 0.36           | 8.4             | 65.1                          | 2.89                          | 22.31                        | 13.46            | 8.36             | 11.2            | 1.87           |
| R-4  | 7.42 | 270 | 205 | 0.24           | 5.7             | 82.2                          | 60.29                         | 0.24                         | 25.23            | 17.75            | 9.9             | 3.56           |
| R-5  | 6.98 | 137 | 93  | 0.06           | 8.4             | 51.8                          | 4.63                          | 3.22                         | 10.46            | 7.35             | 5.3             | 1.7            |
| R-6  | 6.4  | 69  | 54  | 0.13           | 0.9             | 38.3                          | 1.62                          | 0                            | 4.46             | 3.86             | 1.8             | 3.12           |
| R-7  | 5.87 | 106 | 69  | 0.18           | 5.1             | 21.5                          | 2.58                          | 21.77                        | 6.73             | 5.64             | 4.2             | 1.34           |
| R-8  | 6.39 | 149 | 100 | 0.27           | 7.4             | 51.8                          | 12.7                          | 0.19                         | 16.82            | 5.27             | 3.8             | 1.87           |
| R-9  | 6.02 | 152 | 92  | 0.07           | 16.7            | 18.1                          | 1.73                          | 30.34                        | 6.73             | 10.5             | 5.4             | 2.06           |
| R-10 | 7.34 | 311 | 236 | 0.23           | 15.4            | 142.9                         | 14.91                         | 0.95                         | 37.01            | 10.6             | 10.9            | 3.38           |
| R-11 | 7.61 | 160 | 126 | 0.24           | 3.8             | 85.5                          | 4.84                          | 0.25                         | 11.77            | 9.25             | 7.9             | 2.49           |
| R-12 | 7.13 | 160 | 116 | 0.27           | 5.2             | 72.1                          | 4.14                          | 3.4                          | 13.46            | 8.17             | 6.9             | 2.01           |
| R-13 | 6.89 | 120 | 92  | 0.24           | 4.1             | 55.2                          | 5.73                          | 1.32                         | 13.46            | 5.42             | 4.7             | 2.09           |
| R-14 | 7.73 | 433 | 341 | 0.26           | 6.8             | 166.5                         | 76.99                         | 2.34                         | 40.37            | 17.31            | 23.1            | 7.32           |
| R-15 | 7.87 | 434 | 339 | 0.25           | 10.7            | 159.7                         | 78.53                         | 2.32                         | 37.01            | 20.32            | 23.2            | 7.15           |
| R-16 | 5.93 | 57  | 41  | 0.05           | 3.4             | 19.8                          | 1.36                          | 6.58                         | 3.87             | 2.76             | 1.8             | 1.09           |
| R-17 | 6.23 | 93  | 59  | 0.11           | 8               | 26.9                          | 5.88                          | 1.97                         | 6.73             | 3.7              | 4.2             | 1.25           |
| R-18 | 7.36 | 166 | 129 | 0.22           | 3.5             | 85.5                          | 4.75                          | 0.5                          | 19.87            | 5.2              | 6.8             | 2.31           |
| R-19 | 6.12 | 125 | 77  | 0.09           | 11.2            | 24.8                          | 0.88                          | 18.9                         | 10.09            | 3.86             | 4.4             | 2.96           |
| R-20 | 5.9  | 167 | 105 | 0.07           | 18.8            | 22.9                          | 0.41                          | 33.72                        | 12.87            | 5.65             | 7.5             | 3.12           |
| R-21 | 6.2  | 146 | 89  | 0.22           | 14.8            | 21.5                          | 1.31                          | 26.89                        | 5.05             | 8.61             | 6.5             | 4.25           |
| R-22 | 6.25 | 122 | 97  | 0.2            | 18.9            | 24.8                          | 2.66                          | 25.96                        | 10.09            | 7.49             | 4.8             | 2.43           |
| R-23 | 7.61 | 253 | 204 | 0.28           | 3.7             | 146.2                         | 6.52                          | 0.98                         | 16.82            | 17.99            | 7.2             | 4.59           |
| R-24 | 7.64 | 224 | 212 | 0.23           | 1.7             | 156.8                         | 7.21                          | 0.09                         | 23.55            | 13.91            | 4.6             | 3.98           |
| R-25 | 5.85 | 102 | 63  | 0.07           | 10.1            | 20.1                          | 4.03                          | 10.54                        | 6.73             | 5.64             | 3.35            | 2.29           |
| R-26 | 6.18 | 225 | 135 | 0.05           | 30.2            | 28.9                          | 2.12                          | 33.98                        | 12.65            | 11.23            | 12.2            | 3.87           |
| R-27 | 7.3  | 251 | 182 | 0.21           | 11.5            | 102.4                         | 0                             | 15.84                        | 28.6             | 7.93             | 10.2            | 4.88           |
| R-28 | 6.33 | 84  | 67  | 0.09           | 5               | 34.8                          | 2.21                          | 7.17                         | 6.73             | 5.64             | 3.1             | 2.68           |
| R-29 | 7.39 | 153 | 129 | 0.27           | 4.4             | 85.5                          | 4.51                          | 0.48                         | 16.82            | 7.29             | 7.5             | 2.67           |
| R-30 | 7.44 | 177 | 145 | 0.32           | 9               | 93.7                          | 5.04                          | 0.23                         | 16.82            | 8.27             | 9.5             | 2.38           |
| R-31 | 7.47 | 407 | 301 | 0.13           | 32.8            | 136.8                         | 12.91                         | 41.58                        | 30.28            | 15.66            | 20.7            | 9.73           |
| R-32 | 7.31 | 211 | 175 | 0.39           | 6.1             | 112.5                         | 10.79                         | 1.42                         | 20.55            | 10.99            | 7.9             | 4.41           |
| R-33 | 5.98 | 76  | 72  | 0.1            | 4.3             | 34.7                          | 0.38                          | 14.58                        | 6.73             | 3.7              | 4               | 3.79           |
| R-34 | 7.37 | 293 | 225 | 0.51           | 7               | 132.8                         | 29.62                         | 1.17                         | 25.23            | 10.94            | 12.1            | 6.05           |
| R-35 | 7.53 | 290 | 229 | 0.48           | 7.2             | 128.5                         | 28.66                         | 0.62                         | 35.32            | 10.65            | 13.1            | 4.41           |
| R-36 | 7.35 | 293 | 251 | 0.4            | 8               | 141                           | 35.42                         | 1.5                          | 31.96            | 15.61            | 12.8            | 4.05           |
| R-37 | 6.57 | 105 | 93  | 0.11           | 7.2             | 38.1                          | 4.67                          | 18.82                        | 10.09            | 4.6              | 3.8             | 5.52           |
| R-38 | 6.55 | 59  | 55  | 0.27           | 2.6             | 34.8                          | 2.26                          | 0.44                         | 6.73             | 4.67             | 2.5             | 1.14           |
| R-39 | 6.33 | 538 | 395 | 0.24           | 11.2            | 8                             | 268.5                         | 5.39                         | 58.9             | 23.58            | 13.2            | 5.61           |

|      |      |      |      |      |       |       |            |       |       |        |       |       |
|------|------|------|------|------|-------|-------|------------|-------|-------|--------|-------|-------|
| R-40 | 4.12 | 769  | 511  | 0.47 | 3.7   | 0     | 364.6      | 1.72  | 80.7  | 38.51  | 14.1  | 7.3   |
| R-41 | 4.09 | 880  | 643  | 0.4  | 3.2   | 0     | 464.1      | 3.17  | 102.6 | 46.63  | 14.4  | 8.19  |
| R-42 | 4.17 | 2861 | 2023 | 2.68 | 1.5   | 0     | 2105.<br>6 | 3.35  | 457.8 | 160.1  | 39.92 | 17.36 |
| R-43 | 4.04 | 3859 | 2679 | 2.69 | 16.3  | 0     | 2238.<br>4 | 29.49 | 525.7 | 165.22 | 37.2  | 15.32 |
| R-44 | 4.31 | 809  | 655  | 0.63 | 8     | 1.2   | 476.3      | 1.31  | 105.6 | 40.02  | 16.28 | 6.05  |
| R-45 | 7.33 | 317  | 245  | 0.3  | 6.2   | 75.4  | 97.1       | 0.18  | 35.3  | 16.48  | 10.1  | 3.74  |
| R-46 | 7.47 | 1351 | 848  | 0.42 | 150.1 | 250.8 | 217.0      | 1.34  | 92.5  | 25.53  | 98.1  | 12.55 |
| R-47 | 3.36 | 1117 | 848  | 0.9  | 6.1   | 0     | 642.2      | 0.51  | 109.3 | 64.91  | 16.2  | 7.92  |
| R-48 | 3.33 | 1125 | 901  | 0.35 | 7.8   | 0     | 680.0      | 0.99  | 109.3 | 79.49  | 15.5  | 7.21  |
| R-49 | 6.32 | 105  | 65   | 0.09 | 2.5   | 38.2  | 7.69       | 0.46  | 5.05  | 5.69   | 2.3   | 2.76  |
| R-50 | 7.05 | 128  | 99   | 0.13 | 2.2   | 68.7  | 1.23       | 0.14  | 16.82 | 3.4    | 5.5   | 0.98  |

---

**Table S5. Physico-chemical parameters of various water sources during Post-monsoon season.**

| ID   | pH   | EC    | TDS   | F <sup>-</sup> | Cl <sup>-</sup> | HCO <sub>3</sub> <sup>-</sup> | SO <sub>4</sub> <sup>2-</sup> | NO <sub>3</sub> <sup>-</sup> | Ca <sup>2+</sup> | Mg <sup>2+</sup> | Na <sup>+</sup> | K <sup>+</sup> |
|------|------|-------|-------|----------------|-----------------|-------------------------------|-------------------------------|------------------------------|------------------|------------------|-----------------|----------------|
| R-1  | 6.67 | 170.5 | 129.9 | 0.28           | 10.23           | 78.83                         | 5.85                          | 2.84                         | 12.50            | 7.65             | 6.45            | 2.79           |
| R-2  | 7.75 | 138.3 | 104.7 | 0.77           | 5.76            | 59.54                         | 9.56                          | 1.74                         | 10.33            | 5.18             | 5.53            | 2.21           |
| R-3  | 7.29 | 130.7 | 94.0  | 0.57           | 10.00           | 50.54                         | 2.08                          | 2.61                         | 6.76             | 3.65             | 10.37           | 2.97           |
| R-4  | 7.86 | 128.3 | 93.5  | 0.83           | 6.00            | 52.14                         | 3.45                          | 1.73                         | 9.53             | 4.17             | 4.43            | 1.21           |
| R-5  | 7.82 | 132.5 | 104.5 | 0.42           | 6.00            | 50.43                         | 3.13                          | 3.23                         | 7.60             | 3.55             | 6.83            | 1.79           |
| R-6  | 6.74 | 137.7 | 105.5 | 0.76           | 6.77            | 55.44                         | 1.63                          | 4.22                         | 9.61             | 4.54             | 4.23            | 6.02           |
| R-7  | 6.16 | 155.7 | 107.0 | 0.44           | 10.00           | 39.39                         | 3.38                          | 9.34                         | 7.67             | 3.89             | 4.53            | 7.34           |
| R-8  | 6.90 | 278.5 | 172.2 | 0.28           | 16.55           | 60.83                         | 10.35                         | 20.93                        | 12.76            | 6.76             | 8.40            | 8.92           |
| R-9  | 6.15 | 145.6 | 91.0  | 0.25           | 13.77           | 45.76                         | 0.75                          | 24.55                        | 8.86             | 4.98             | 8.31            | 5.85           |
| R-10 | 7.42 | 298.0 | 220.2 | 0.73           | 26.00           | 116.18                        | 16.64                         | 2.34                         | 30.54            | 6.32             | 14.56           | 6.85           |
| R-11 | 7.22 | 130.4 | 97.3  | 0.36           | 6.76            | 60.94                         | 2.71                          | 2.44                         | 9.79             | 5.14             | 4.12            | 1.94           |
| R-12 | 7.66 | 195.0 | 139.9 | 0.26           | 8.00            | 70.36                         | 18.45                         | 3.85                         | 15.01            | 6.76             | 6.62            | 2.02           |
| R-13 | 6.57 | 148.4 | 102.3 | 0.26           | 12.00           | 39.39                         | 2.24                          | 20.78                        | 11.29            | 4.32             | 5.12            | 4.38           |
| R-14 | 8.06 | 604.6 | 365.7 | 0.78           | 9.98            | 140.54                        | 164.49                        | 3.52                         | 49.81            | 33.59            | 12.13           | 9.21           |
| R-15 | 7.40 | 513.0 | 339.0 | 0.61           | 8.00            | 136.09                        | 108.50                        | 2.62                         | 35.26            | 23.13            | 16.21           | 8.56           |
| R-16 | 6.15 | 161.2 | 109.4 | 0.49           | 24.00           | 39.39                         | 2.32                          | 13.73                        | 6.37             | 5.55             | 14.12           | 1.63           |
| R-17 | 6.08 | 122.4 | 79.5  | 0.38           | 10.21           | 30.86                         | 9.53                          | 6.50                         | 6.11             | 4.23             | 6.43            | 4.85           |
| R-18 | 7.78 | 118.0 | 103.2 | 0.28           | 6.00            | 43.52                         | 3.41                          | 1.76                         | 9.37             | 4.07             | 3.92            | 0.89           |
| R-19 | 6.49 | 408.0 | 243.0 | 0.38           | 30.23           | 67.83                         | 23.21                         | 43.21                        | 25.10            | 9.98             | 12.19           | 8.46           |
| R-20 | 6.03 | 132.8 | 84.0  | 0.55           | 18.00           | 25.55                         | 1.33                          | 22.11                        | 8.86             | 3.75             | 7.68            | 4.44           |
| R-21 | 6.11 | 89.7  | 60.4  | 0.33           | 9.96            | 28.02                         | 2.36                          | 4.19                         | 5.86             | 3.32             | 3.87            | 2.79           |
| R-22 | 6.44 | 144.2 | 98.7  | 0.66           | 10.21           | 36.54                         | 3.46                          | 13.05                        | 7.33             | 3.60             | 5.72            | 7.35           |
| R-23 | 7.21 | 214.7 | 166.1 | 0.31           | 5.12            | 109.20                        | 6.41                          | 1.35                         | 15.25            | 10.12            | 4.11            | 4.85           |
| R-24 | 7.51 | 232.8 | 183.2 | 0.70           | 6.00            | 127.20                        | 7.83                          | 1.35                         | 18.87            | 10.08            | 5.32            | 4.54           |
| R-25 | 5.90 | 89.3  | 62.1  | 0.41           | 7.32            | 22.33                         | 0.73                          | 12.42                        | 4.49             | 2.67             | 5.27            | 3.72           |
| R-26 | 6.75 | 489.4 | 311.2 | 0.07           | 52.00           | 104.80                        | 13.15                         | 57.77                        | 28.09            | 15.26            | 30.82           | 9.27           |
| R-27 | 6.49 | 287.5 | 189.1 | 0.39           | 26.00           | 53.61                         | 7.23                          | 57.87                        | 17.75            | 11.97            | 9.15            | 7.23           |
| R-28 | 6.55 | 280.3 | 183.1 | 0.38           | 18.00           | 90.87                         | 4.22                          | 47.33                        | 18.27            | 10.87            | 18.60           | 9.11           |
| R-29 | 7.80 | 137.9 | 121.4 | 0.43           | 10.87           | 70.36                         | 4.28                          | 2.31                         | 12.24            | 5.32             | 6.92            | 2.13           |
| R-30 | 7.98 | 188.5 | 136.8 | 0.80           | 10.00           | 90.58                         | 4.62                          | 1.89                         | 16.21            | 6.76             | 7.39            | 1.78           |
| R-31 | 6.77 | 245.6 | 160.6 | 0.24           | 24.00           | 64.98                         | 4.09                          | 30.23                        | 18.84            | 7.48             | 11.23           | 2.23           |
| R-32 | 7.64 | 115.9 | 95.6  | 0.44           | 6.88            | 60.98                         | 2.49                          | 2.57                         | 10.87            | 4.53             | 5.57            | 2.12           |
| R-33 | 5.94 | 108.9 | 63.6  | 0.32           | 10.00           | 43.54                         | 1.99                          | 17.90                        | 8.82             | 4.43             | 6.12            | 2.32           |
| R-34 | 7.61 | 283.2 | 206.0 | 0.76           | 9.66            | 116.18                        | 28.45                         | 1.78                         | 23.67            | 9.06             | 9.32            | 5.52           |
| R-35 | 7.80 | 281.7 | 195.7 | 0.65           | 8.00            | 107.65                        | 32.58                         | 1.60                         | 23.86            | 8.17             | 9.34            | 6.52           |
| R-36 | 7.63 | 286.6 | 213.8 | 0.45           | 10.23           | 112.54                        | 28.42                         | 2.24                         | 24.08            | 7.37             | 11.56           | 6.43           |
| R-37 | 6.37 | 130.7 | 83.6  | 0.41           | 14.00           | 32.43                         | 3.06                          | 12.11                        | 6.53             | 3.42             | 9.56            | 4.23           |
| R-38 | 6.19 | 157.4 | 95.4  | 0.37           | 26.00           | 36.66                         | 5.43                          | 12.58                        | 4.26             | 2.53             | 24.58           | 2.66           |
| R-39 | 6.17 | 276.6 | 163.1 | 0.32           | 36.00           | 35.42                         | 26.96                         | 30.96                        | 12.54            | 7.54             | 22.11           | 4.94           |

|      |      |        |       |      |       |       |        |       |       |       |       |      |
|------|------|--------|-------|------|-------|-------|--------|-------|-------|-------|-------|------|
| R-40 | 5.23 | 566.2  | 317.5 | 0.59 | 20.00 | 18.96 | 183.34 | 10.71 | 42.55 | 23.13 | 14.87 | 7.27 |
| R-41 | 4.02 | 901.0  | 371.1 | 0.66 | 14.00 | 0.00  | 224.71 | 8.33  | 63.21 | 37.74 | 14.38 | 8.12 |
| R-42 | 3.67 | 2391.0 | 409.8 | 1.91 | 12.00 | 0.00  | 291.61 | 63.63 | 27.72 | 10.22 | 1.69  | 1.01 |
| R-43 | 4.20 | 2052.0 | 390.5 | 1.40 | 16.00 | 0.00  | 285.78 | 38.36 | 33.42 | 11.80 | 2.61  | 1.16 |
| R-44 | 4.60 | 731.0  | 357.1 | 0.34 | 14.00 | 5.26  | 214.74 | 2.33  | 63.23 | 36.14 | 13.70 | 7.35 |
| R-45 | 7.79 | 137.7  | 106.6 | 0.75 | 6.00  | 62.14 | 15.87  | 2.52  | 8.98  | 4.23  | 4.79  | 1.29 |
| R-46 | 6.96 | 613.8  | 359.7 | 0.89 | 84.00 | 50.77 | 87.85  | 25.55 | 31.73 | 5.38  | 63.75 | 9.77 |
| R-47 | 3.60 | 1130.0 | 271.2 | 0.79 | 4.00  | 0.00  | 246.05 | 1.10  | 8.26  | 6.87  | 2.88  | 1.25 |
| R-48 | 3.57 | 1131.0 | 270.7 | 0.54 | 6.00  | 0.00  | 244.53 | 0.96  | 8.00  | 6.52  | 2.90  | 1.22 |

---
